# Supplementary material for: The interplay between cognitive tasks and vision for upright posture balance in adolescents
Source: PeerJ. 2019 Sep 25;7:e7693. doi: 10.7717/peerj.7693 (PMC6765351; doi:10.7717/peerj.7693)
Supplement: Data S1 [file peerj-07-7693-s001.xlsx]

## Sheet: RMS,RQ
	No cognitive task	bal_sway_x			bal_sway_y				simple cognitive task	bal_sway_x			bal_sway_y				difficulty cognitive task	bal_sway_x			bal_sway_y
		vision	no vision	RQ	vision	no vision	RQ			vision	no vision	RQ	vision	no vision	RQ			vision	no vision	RQ	vision	no vision	RQ
sub1		0.438	0.539	1.23059	0.245	0.317	1.29388			0.605	1.227	2.0281	0.349	0.661	1.89398			0.628	0.944	1.50318	0.446	0.549	1.23094
sub2		0.751	1.147	1.5273	0.391	0.663	1.69565			1.101	1.059	0.961853	0.625	1.217	1.9472			0.666	1.116	1.67568	0.614	0.516	0.840391
sub3		0.441	0.722	1.63719	0.478	0.484	1.01255			0.735	1.214	1.6517	0.496	0.971	1.95766			0.891	0.994	1.1156	0.581	0.706	1.21515
sub4		0.644	0.95	1.47516	0.236	0.366	1.55085			0.782	0.854	1.09207	0.428	0.401	0.936916			0.728	0.738	1.01374	0.512	0.42	0.820312
sub5		0.5	0.716	1.432	0.499	0.391	0.783567			0.981	0.877	0.893986	0.742	0.646	0.87062			0.614	0.674	1.09772	0.599	0.454	0.75793
sub6		0.334	0.81	2.42515	0.467	0.522	1.11777			0.72	0.699	0.970833	0.474	0.483	1.01899			0.9	0.757	0.841111	0.503	0.482	0.95825
sub7		0.503	0.746	1.4831	0.323	0.292	0.904025			0.663	1.23	1.8552	0.482	0.45	0.93361			1.107	0.833	0.752484	0.69	0.561	0.813043
sub8		0.554	0.605	1.09206	0.394	0.378	0.959391			0.594	0.889	1.49663	0.45	0.365	0.811111			0.658	0.724	1.1003	0.372	0.305	0.819892
sub9		0.807	0.94	1.16481	0.486	0.431	0.886831			0.877	1.212	1.38198	0.517	0.734	1.41973			0.786	1.003	1.27608	0.712	0.692	0.97191
sub10		0.445	0.543	1.22022	0.319	0.322	1.0094			0.614	0.74	1.20521	0.364	0.369	1.01374			0.699	0.789	1.12876	0.381	0.418	1.09711
sub11		0.555	0.654	1.17838	0.405	0.522	1.28889			1.725	0.913	0.529275	0.69	0.551	0.798551			1.708	0.533	0.312061	0.526	0.397	0.754753
sub12		0.571	0.777	1.36077	0.444	0.613	1.38063			0.852	0.657	0.771127	0.873	0.389	0.44559			0.573	0.756	1.31937	0.322	0.328	1.01863
sub13		0.681	0.893	1.31131	0.29	0.271	0.934483			0.859	1.069	1.24447	0.319	0.297	0.931034			0.776	0.878	1.13144	0.338	0.406	1.20118
sub14		0.711	0.958	1.3474	0.544	0.366	0.672794			0.884	1.046	1.18326	0.517	0.487	0.941973			1.206	0.966	0.800995	0.573	0.468	0.816754
sub15		0.498	0.655	1.31526	0.433	0.358	0.82679			0.674	1	1.48368	0.44	0.603	1.37045			0.694	0.718	1.03458	0.341	0.44	1.29032
sub16		0.448	0.737	1.64509	0.257	0.298	1.15953			0.644	0.487	0.756211	0.4	0.244	0.61			0.368	0.586	1.59239	0.281	0.302	1.07473
sub17		0.456	0.705	1.54605	0.391	0.381	0.974425			0.54	0.646	1.1963	0.377	0.444	1.17772			0.699	0.649	0.928469	0.43	0.38	0.883721
sub18		0.581	1.138	1.95869	0.289	0.585	2.02422			0.646	0.969	1.5	0.365	0.464	1.27123			0.65	1.047	1.61077	0.49	0.479	0.977551
sub19		0.584	0.97	1.66096	0.562	0.541	0.962633			0.854	1.516	1.77518	0.585	1.608	2.74872			0.562	0.95	1.69039	0.348	0.376	1.08046
sub20		0.662	0.713	1.07704	0.442	0.442	1			0.756	0.972	1.28571	0.395	0.336	0.850633			0.603	0.665	1.10282	0.334	0.241	0.721557
sub21		0.504	0.591	1.17262	0.313	0.308	0.984026			0.628	0.872	1.38854	0.472	0.671	1.42161			0.597	0.719	1.20436	0.546	0.441	0.807692

## Sheet: MV,RQ
	No cognitive task	mv				simple cognitive task	mv				difficulty cognitive task	mv
		vision	no vision	RQ			vision	no vision	RQ			vision	no vision	RQ
sub1		8.64	10.43	1.20718			12.2	23.53	1.92869			13.38	18.64	1.39312
sub2		14.41	22.33	1.54962			21.24	27.88	1.31262			15.76	20.69	1.31282
sub3		11.54	15.31	1.32669			15.22	27.01	1.77464			18.38	21.16	1.15125
sub4		11.3	16.58	1.46726			15.23	15.7	1.03086			15.35	14.1	0.918567
sub5		11.9	13.49	1.13361			21.2	18.42	0.868868			14.39	13.69	0.951355
sub6		10.16	16.15	1.58957			14.37	14.32	0.996521			17.17	14.85	0.864881
sub7		10.77	14.26	1.32405			15.1	16.12	1.06755			23.96	18.74	0.782137
sub8		12.52	13.12	1.04792			14.1	17.15	1.21631			14.01	14.28	1.01927
sub9		17.5	18.8	1.07429			18.69	26.47	1.41627			20.04	22.58	1.12675
sub10		9.84	11.44	1.1626			13.49	14.96	1.10897			14.51	16.19	1.11578
sub11		12.96	15.51	1.19676			33.43	20.06	0.60006			31.77	12.35	0.388732
sub12		13.74	18.42	1.34061			22.81	13.73	0.601929			12.07	14.79	1.22535
sub13		13.02	16.4	1.2596			16.1	19.37	1.20311			15.02	17.17	1.14314
sub14		16.59	18.41	1.1097			18.97	21.39	1.12757			23.84	19.51	0.818372
sub15		12.12	13.63	1.12459			14.9	17.22	1.1557			14.14	15.81	1.1181
sub16		9.73	14.27	1.4666			14.04	9.95	0.708689			8.8	12.31	1.39886
sub17		14.86	20.35	1.36945			18.27	39.59	2.16694			11.81	18.23	1.54361
sub18		11.18	14.58	1.30411			12.23	14.27	1.1668			14.94	14.05	0.940428
sub19		11.62	23.02	1.98107			13.75	19.31	1.40436			15.02	20.62	1.37284
sub20		14.55	15.61	1.07285			16.16	18.52	1.14604			12.84	12.91	1.00545
sub21		11.06	12.27	1.1094			14.61	20.51	1.40383			15.1	15.41	1.02053
